# Supplementary material
Source: PubMed Central journal article supplement (PMC1769433)
Supplement: pbio.0050008.sg002.pdf [file pbio.0050008.sg002.pdf]

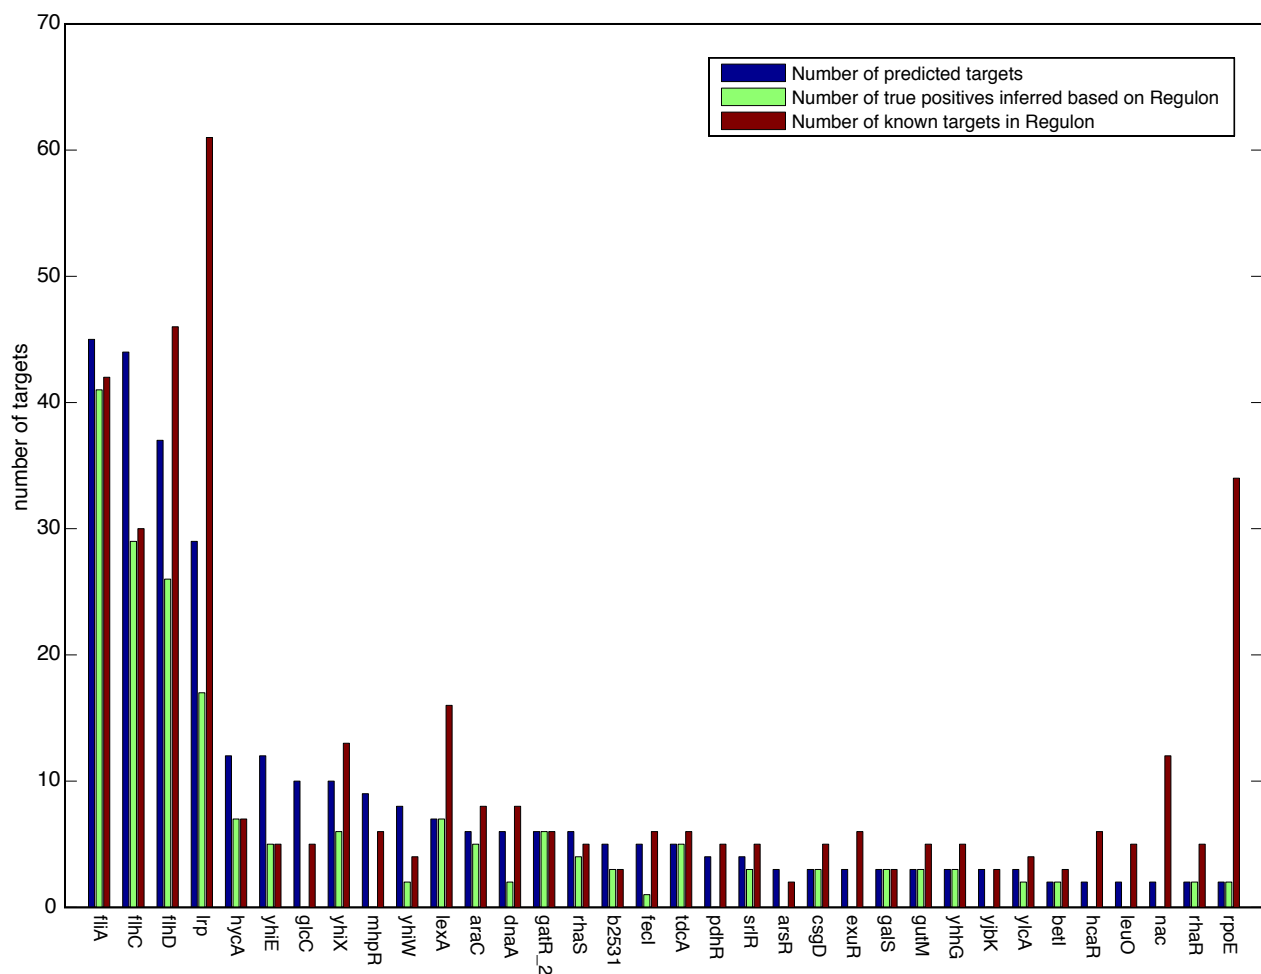

**Figure S2. Transcription factor recall**

Transcription factors, with at least two inferred interactions (blue bar), have high recall (47% on average) of their known targets (green bar –vs- red bar); this suggests that when the transcription factors in the compendium are perturbed by the appropriate condition, then much of that transcription factor’s regulon is correctly identified.
