# Supplementary material
Source: PubMed Central journal article supplement (PMC1769433)
Supplement: pbio.0050008.sg003.pdf [file pbio.0050008.sg003.pdf]

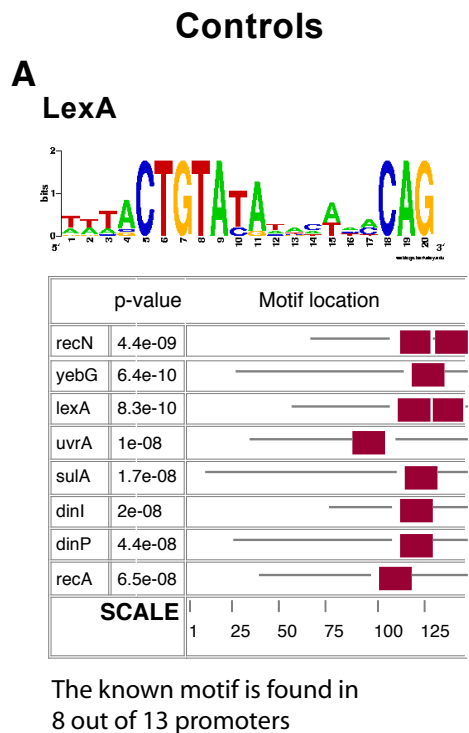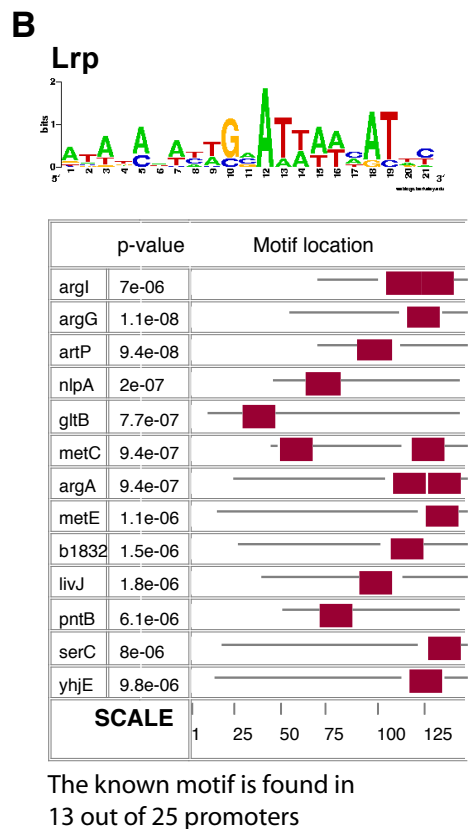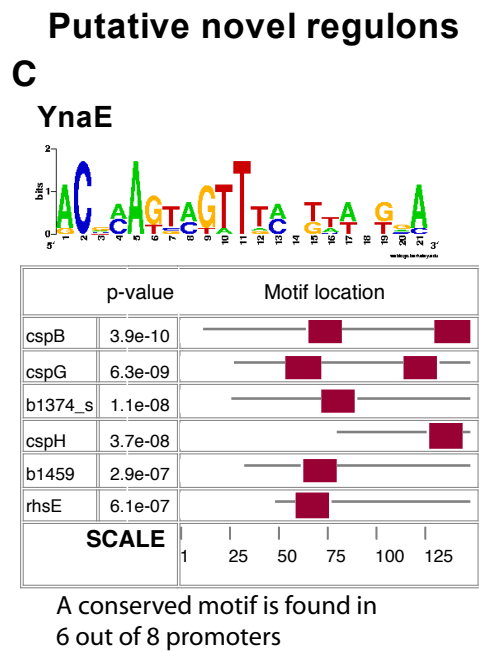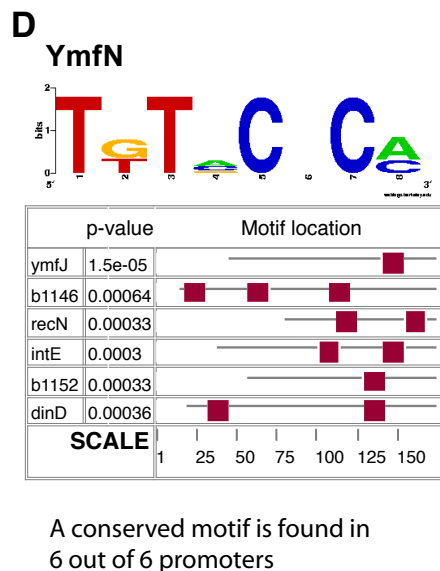

**Figure S3. Motifs detected for four of the transcription factors with five or more target operons.**

- (A) The canonical LexA regulatory motif was detected in the promoters of 8 out of the 13 genes inferred to be LexA targets.
- (B) The canonical Lrp regulatory motif was also detected with high significance.
- (C) A novel motif was found for YnaE, a transcription factor that may play a role in the regulation of a prophage or DNA repair.
- (D) YmfN, another prophage-related transcription factor with no known regulatory targets, had a strong motif conserved in all of its predicted targets.
