# Supplementary material
Source: PubMed Central journal article supplement (PMC1769433)
Supplement: pbio.0050008.sg004.pdf [file pbio.0050008.sg004.pdf]

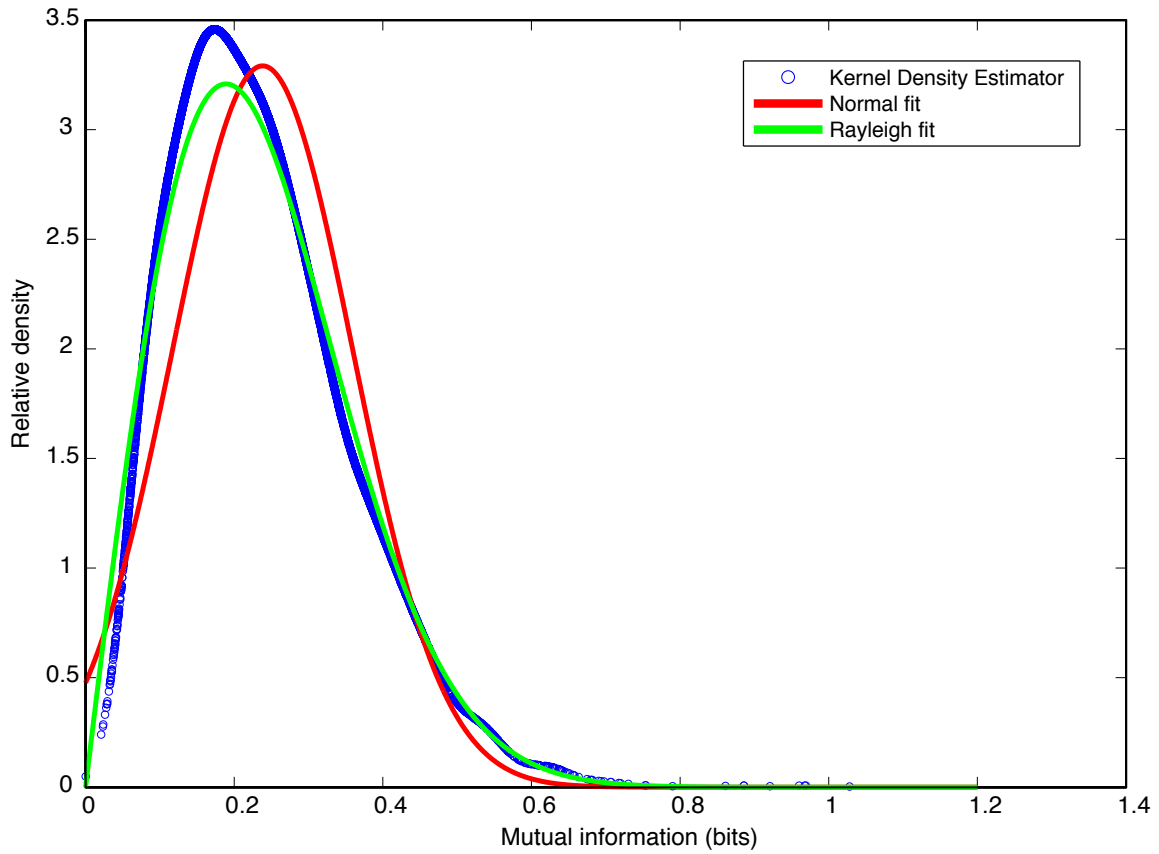

**Figure S4. Estimating the distribution of mutual information.**

The distribution of mutual information for both genes of a potential regulatory interaction is used to estimate the significance of mutual information. The distribution of mutual information for one gene *lexA* illustrates different types of fit. Normal fit, while not the best approximation to the empirical distribution, penalizes the distal network neighborhood.
